# Supplementary material for: The Research on Huanglian Jiedu Decoction against Atopic Dermatitis
Source: Hindawi journal article supplement (doi:10.1155/2021/5557908), 2021-02-22
Supplement: f1 [file 5557908.f1.doc]

Supplemental Table 1 Information of 81 Active Components of Huanglian Jiedu Decoction

| **Mol ID** | **Molecule Name** | **MW** | **OB(%)** | **DL** |
| --- | --- | --- | --- | --- |
| MOL002903 | (R)-Canadine | 339.42 | 55.37 | 0.77 |
| MOL002904 | Berlambine | 351.38 | 36.68 | 0.82 |
| MOL002907 | Corchoroside A_qt | 404.55 | 104.95 | 0.78 |
| MOL008647 | Moupinamide | 313.38 | 86.71 | 0.26 |
| MOL001689 | acacetin | 284.28 | 34.97 | 0.24 |
| MOL000173 | wogonin | 284.28 | 30.68 | 0.23 |
| MOL000228 | (2R)-7-hydroxy-5-methoxy-2-phenylchroman-4-one | 270.3 | 55.23 | 0.2 |
| MOL002714 | baicalein | 270.25 | 33.52 | 0.21 |
| MOL002908 | 5,8,2'-Trihydroxy-7-methoxyflavone | 300.28 | 37.01 | 0.27 |
| MOL002909 | 5,7,2,5-tetrahydroxy-8,6-dimethoxyflavone | 376.34 | 33.82 | 0.45 |
| MOL002910 | Carthamidin | 288.27 | 41.15 | 0.24 |
| MOL002911 | 2,6,2',4'-tetrahydroxy-6'-methoxychaleone | 302.3 | 69.04 | 0.22 |
| MOL002913 | Dihydrobaicalin_qt | 272.27 | 40.04 | 0.21 |
| MOL002914 | Eriodyctiol(flavanone) | 288.27 | 41.35 | 0.24 |
| MOL002915 | Salvigenin | 328.34 | 49.07 | 0.33 |
| MOL002917 | 5,2',6'-Trihydroxy-7,8-dimethoxyflavone | 330.31 | 45.05 | 0.33 |
| MOL002925 | 5,7,2',6'-Tetrahydroxyflavone | 286.25 | 37.01 | 0.24 |
| MOL002926 | dihydrooroxylin A | 286.3 | 38.72 | 0.23 |
| MOL002927 | Skullcapflavone II | 374.37 | 69.51 | 0.44 |
| MOL002928 | oroxylin a | 284.28 | 41.37 | 0.23 |
| MOL002932 | Panicolin | 314.31 | 76.26 | 0.29 |
| MOL002933 | 5,7,4'-Trihydroxy-8-methoxyflavone | 300.28 | 36.56 | 0.27 |
| MOL000525 | Norwogonin | 270.25 | 39.4 | 0.21 |
| MOL000552 | 5,2'-Dihydroxy-6,7,8-trimethoxyflavone | 344.34 | 31.71 | 0.35 |
| MOL000073 | ent-Epicatechin | 290.29 | 48.96 | 0.24 |
| MOL001490 | bis[(2S)-2-ethylhexyl]benzene-1,2-dicarboxylate | 390.62 | 43.59 | 0.35 |
| MOL002879 | Diop | 390.62 | 43.59 | 0.39 |
| MOL002897 | epiberberine | 336.39 | 43.09 | 0.78 |
| MOL008206 | Moslosooflavone | 298.31 | 44.09 | 0.25 |
| MOL010415 | 11,13-Eicosadienoic acid, methyl ester | 322.59 | 39.28 | 0.23 |
| MOL012245 | 5,7,4'-trihydroxy-6-methoxyflavanone | 302.3 | 36.63 | 0.27 |
| MOL012266 | rivularin | 344.34 | 37.94 | 0.37 |
| MOL002652 | delta7-Dehydrosophoramine | 242.35 | 54.45 | 0.25 |
| MOL002663 | Skimmianin | 259.28 | 40.14 | 0.2 |
| MOL000622 | Magnograndiolide | 266.37 | 63.71 | 0.19 |
| MOL002662 | rutaecarpine | 287.34 | 40.3 | 0.6 |
| MOL002651 | Dehydrotanshinone IIA | 292.35 | 43.76 | 0.4 |
| MOL002644 | Phellopterin | 300.33 | 40.19 | 0.28 |
| MOL001458 | coptisine | 320.34 | 30.67 | 0.86 |
| MOL002894 | berberrubine | 322.36 | 35.74 | 0.73 |
| MOL006422 | thalifendine | 322.36 | 44.41 | 0.73 |
| MOL002666 | Chelerythrine | 332.37 | 34.18 | 0.78 |
| MOL002668 | Worenine | 334.37 | 45.83 | 0.87 |
| MOL001454 | berberine | 336.39 | 36.86 | 0.78 |
| MOL001455 | (S)-Canadine | 339.42 | 53.83 | 0.77 |
| MOL000790 | Isocorypalmine | 341.44 | 35.77 | 0.59 |
| MOL000785 | palmatine | 352.44 | 64.6 | 0.65 |
| MOL000787 | Fumarine | 353.4 | 59.26 | 0.83 |
| MOL002670 | Cavidine | 353.45 | 35.64 | 0.81 |
| MOL001131 | phellamurin_qt | 356.4 | 56.6 | 0.39 |
| MOL002641 | Phellavin_qt | 374.42 | 35.86 | 0.44 |
| MOL005438 | campesterol | 400.76 | 37.58 | 0.71 |
| MOL002643 | delta 7-stigmastenol | 414.79 | 37.42 | 0.75 |
| MOL001771 | poriferast-5-en-3beta-ol | 414.79 | 36.91 | 0.75 |
| MOL013352 | Obacunone | 454.56 | 43.29 | 0.77 |
| MOL002660 | niloticin | 456.78 | 41.41 | 0.82 |
| MOL006392 | dihydroniloticin | 458.8 | 36.43 | 0.82 |
| MOL006401 | melianone | 470.76 | 40.53 | 0.78 |
| MOL002673 | Hispidone | 472.78 | 36.18 | 0.83 |
| MOL002659 | kihadanin A | 486.56 | 31.6 | 0.7 |
| MOL006413 | phellochin | 488.83 | 35.41 | 0.82 |
| MOL000762 | Palmidin A | 510.52 | 35.36 | 0.65 |
| MOL002636 | Kihadalactone A | 512.7 | 34.21 | 0.82 |
| MOL002672 | Hericenone H | 580.88 | 39 | 0.63 |
| MOL002671 | Candletoxin A | 608.79 | 31.81 | 0.69 |
| MOL001406 | crocetin | 328.44 | 35.3 | 0.26 |
| MOL001663 | (4aS,6aR,6aS,6bR,8aR,10R,12aR,14bS)-10-hydroxy-2,2,6a,6b,9,9,12a-heptamethyl-1,3,4,5,6,6a,7,8,8a,10,11,12,13,14b-tetradecahydropicene-4a-carboxylic acid | 456.78 | 32.03 | 0.76 |
| MOL001941 | Ammidin | 270.3 | 34.55 | 0.22 |
| MOL004561 | Sudan III | 352.42 | 84.07 | 0.59 |
| MOL000098 | quercetin | 302.25 | 46.43 | 0.28 |
| MOL000358 | beta-sitosterol | 414.79 | 36.91 | 0.75 |
| MOL000422 | kaempferol | 286.25 | 41.88 | 0.24 |
| MOL000449 | Stigmasterol | 412.77 | 43.83 | 0.76 |
| MOL001494 | Mandenol | 308.56 | 42 | 0.19 |
| MOL001506 | Supraene | 410.8 | 33.55 | 0.42 |
| MOL001942 | isoimperatorin | 270.3 | 45.46 | 0.23 |
| MOL002883 | Ethyl oleate (NF) | 310.58 | 32.4 | 0.19 |
| MOL003095 | 5-hydroxy-7-methoxy-2-(3,4,5-trimethoxyphenyl)chromone | 358.37 | 51.96 | 0.41 |
| MOL007245 | 3-Methylkempferol | 300.28 | 60.16 | 0.26 |
| MOL009038 | GBGB | 550.57 | 45.58 | 0.83 |
| MOL002331 | N-Methylflindersine | 241.31 | 32.36 | 0.18 |
